# Supplementary material
Source: ML conference proceedings conference paper supplement (https://openreview.net/forum?id=ffLKUFlsFK0)
Supplement: supplementary_material [file attachment]

## A Appendix

Table 1 summarizes all the hyper-parameters used in the implementation of the baselines as well as the Deep RePreL agent.

| Hyperparameters                        | Values                                                                                                                      | Exceptions                                          |
|----------------------------------------|-----------------------------------------------------------------------------------------------------------------------------|-----------------------------------------------------|
| Learning Rate                          | 0.003                                                                                                                       | —                                                   |
| Batch Size                             | 128                                                                                                                         | —                                                   |
| Input Size (State Dimension) in Taxi   | 91                                                                                                                          | 69 for RePreL abstract state                        |
| Input Size (State Dimension) in Office | 11                                                                                                                          | 4 for option pickup and 5 for option drop in RePreL |
| Output Size (# of Actions) in Taxi     | 6                                                                                                                           | 2 for HDQN meta-controller                          |
| Output Size (# of Actions) in Office   | 4                                                                                                                           | 3 for HDQN meta-controller                          |
| Hidden layers                          | 2                                                                                                                           | —                                                   |
| Hidden units                           | 256                                                                                                                         |                                                     |
| Discount Rate                          | 0.99                                                                                                                        | —                                                   |
| Max Episode Length                     | 150 for <i>task</i> 1, 200 for <i>task</i> 2, and 300 for <i>task</i> 3 of Taxi Domain; 1000 for both tasks of office World |                                                     |
| Intrinsic reward on subgoals           | 30                                                                                                                          | no intrinsic reward in DQN                          |
| Max buffer size                        | 1e5                                                                                                                         | —                                                   |
| Exploration Epsilon                    | Fixed 0.1 for Taxi; Decay from 1 to 0.1 with rate in Office World                                                           |                                                     |
| Max steps in training environment      | 1e6                                                                                                                         | —                                                   |

Table 1: Summary of hyperparameters used
